# Supplementary material for: Point-of-care SARS-CoV-2 sensing using lens-free imaging and a deep learning-assisted quantitative agglutination assay
Source: Royal Society of Chemistry journal article supplement (doi:10.1039/d2lc00289b), 2022-01-01
Supplement: d2lc00289b1.pdf [file d2lc00289b1.pdf]

## Supporting Information

### **Point-of-care SARS-CoV-2 sensing using lens-free imaging and a deep learning-assisted quantitative agglutination assay**

Colin J. Potter,<sup>ab</sup> Yanmei Hu,<sup>c‡</sup> Zhen Xiong,<sup>a</sup> Jun Wang,<sup>c‡</sup> and Euan McLeod<sup>a\*</sup>

<sup>a</sup> Wyant College of Optical Sciences, University of Arizona, Tucson, Arizona 85721, USA

<sup>b</sup> College of Medicine, University of Arizona, Tucson, Arizona 85724, USA

<sup>c</sup> Department of Pharmacology, University of Arizona, Tucson, Arizona 85724, USA

<sup>‡</sup>Present address: Ernest Mario School of Pharmacy, Rutgers, the State University of New Jersey, Piscataway, New Jersey 08854

\*euanmc@optics.arizona.edu

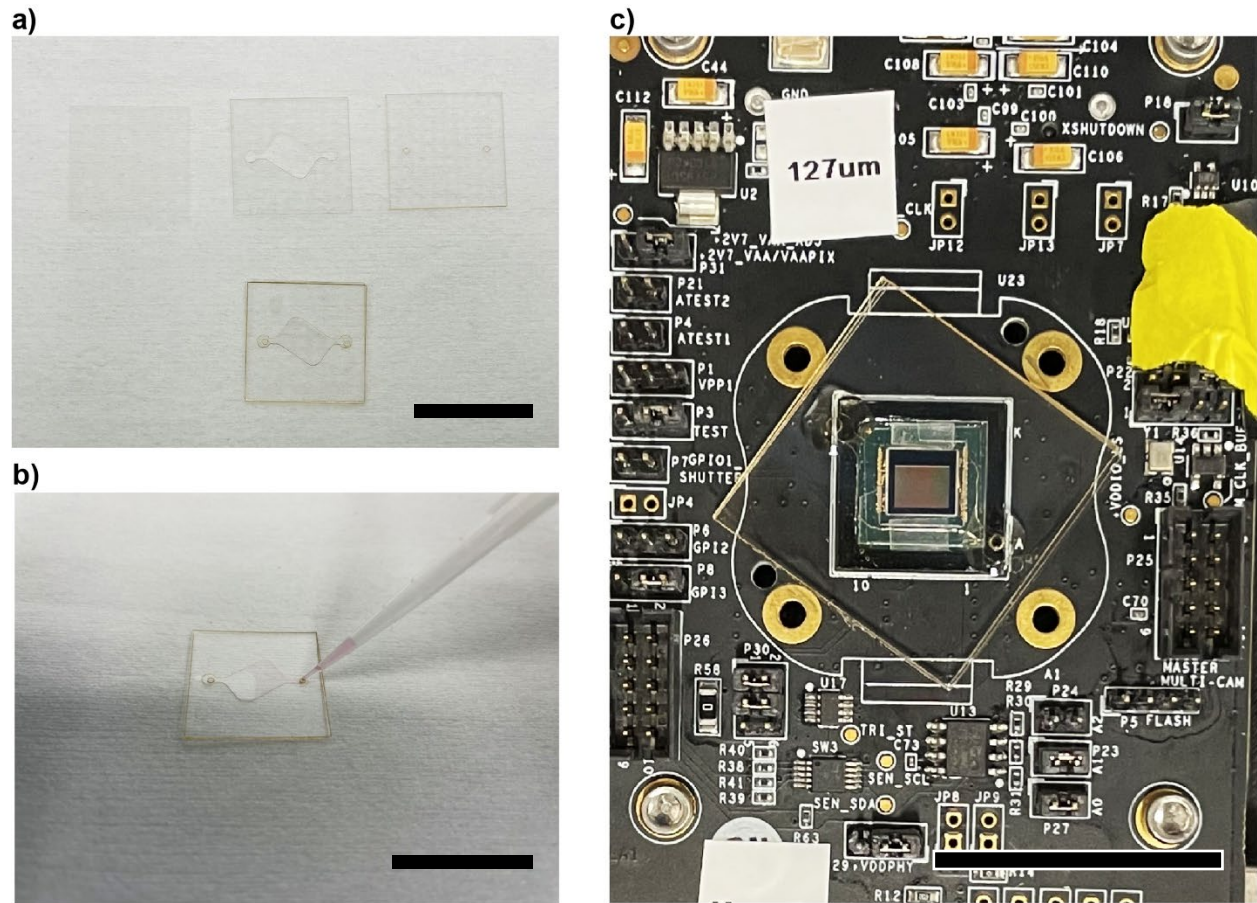

**Figure S1:** **a)** Imaging chamber components, from left to right on top: glass coverslip, 125 μm thick polycarbonate (PC) chamber spacer, 250 μm thick PC cover. **b)** Imaging chamber filling with 1:1 DMEM + pseudovirus and PBS + latex bead suspension. **c)** Imaging chip placed on top of image sensor inside the portable LFHM. Scale bars = 25 mm.

a)

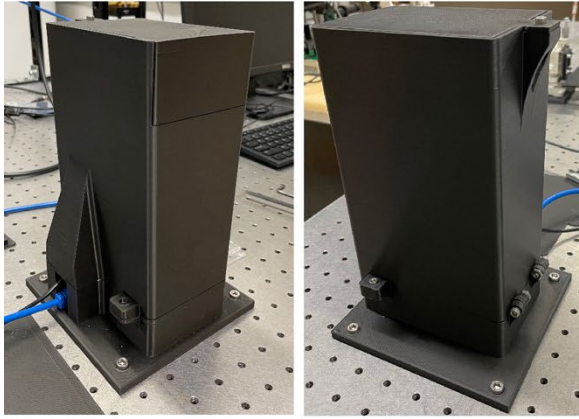

b)

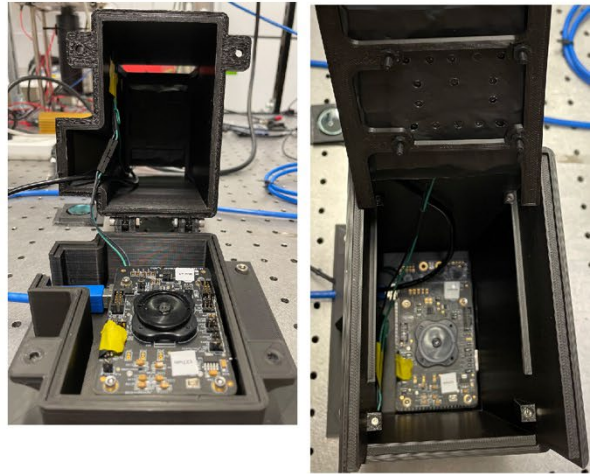

c)

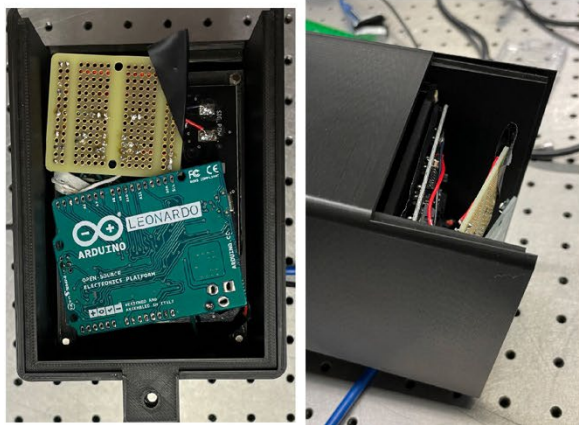

**Figure S2:** **a)** External view of portable LFHM housing. Top portion is hinged to facilitate loading of imaging chamber into the biosensor. **b)** Placement of image sensor within the base of the housing. **c)** Custom LED array and Arduino Leonardo microcontroller in top compartment of the housing. The underlying optical table has holes on a one-inch grid.

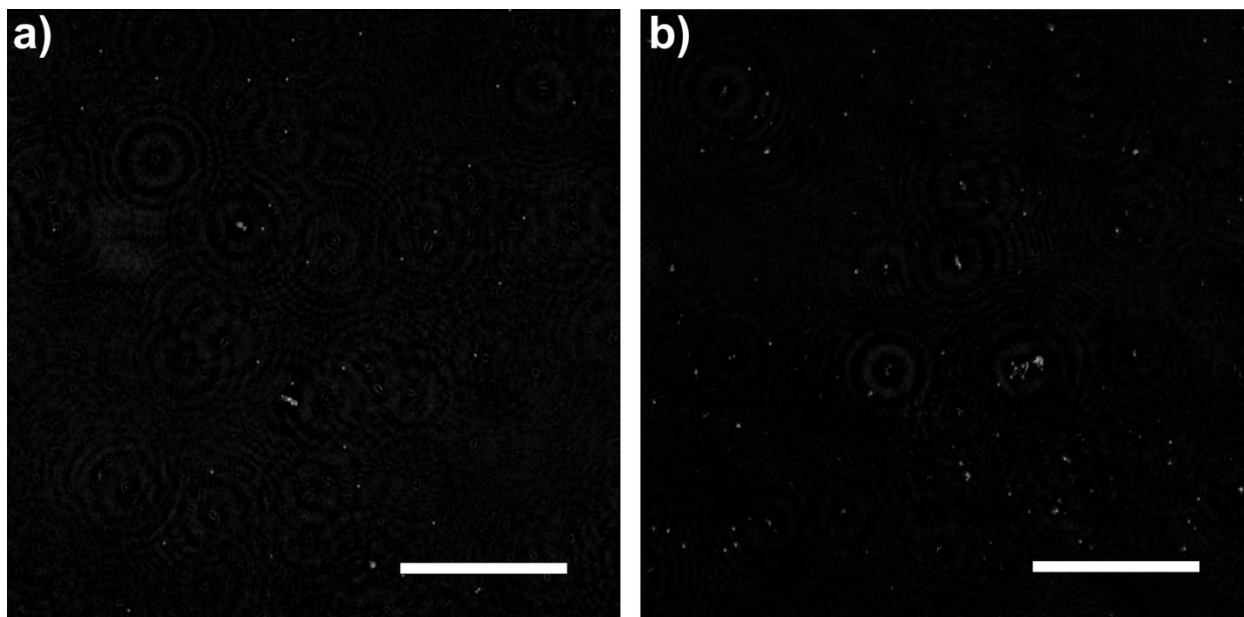

**Figure S3): a)** Representative image of sample of filtered SARS-CoV-2 pseudovirus with 0.0025% latex beads. Despite filtering, there is still debris present. **b)** Representative image of sample of unfiltered SARS-CoV-2 pseudovirus with 0.005% latex beads. Without filtering, there is more debris and particle irregularity. Scale bars = 150  $\mu\text{m}$ .
